# Supplementary material for: An unusual highly emissive water-soluble iridium lissamine-alanine complex and its use in a molecular logic gate
Source: Royal Society of Chemistry journal article supplement (doi:10.1039/c5dt03666f), 2015-12-02
Supplement: c5dt03666f1.pdf [file c5dt03666f1.pdf]

# **Electronic Supporting Information**

## **(ESI)**

## *Table of Contents*

|                                                              |     |
|--------------------------------------------------------------|-----|
| <i>I</i> – Experimental Section.....                         | S3  |
| <i>II</i> – MALDI-TOF-MS spectra.....                        | S4  |
| <i>III</i> – NMR data.....                                   | S5  |
| <i>IV</i> – Titration of compound <b>1</b> with the pH ..... | S11 |
| <i>V</i> – Theoretical calculations-----                     | S12 |
| References.....                                              | S13 |

# An unusual highly emissive water-soluble Iridium Lissamine-Alanine complex with a molecular logic gate approach.

E. Oliveira<sup>a,b,c\*</sup>, S.M. Santos<sup>d</sup>, C. Núñez<sup>a,e</sup>, J. L. Capelo<sup>a,b</sup> and C. Lodeiro<sup>a,b\*</sup>

<sup>a</sup>UCIBIO, REQUIMTE, Departamento de Química, Faculdade de Ciências e Tecnologia, Universidade Nova de Lisboa, 2829-516 Caparica, Portugal

<sup>b</sup>ProteoMass Scientific Society. Madan Parque. Rua dos Inventores. 2825-182. Caparica. Portugal

<sup>c</sup>Veterinary Science Department and CECAV, University of Trás-os-Montes and Alto Douro, 5001-801, Vila Real, Portugal.

<sup>d</sup>Department of Chemistry and CICECO, University of Aveiro, Campus de Santiago, 3810-193 Aveiro, Portugal

<sup>e</sup>Inorganic Chemistry Department, Faculty of Chemistry, University of Santiago de Compostela, 15782 Santiago de Compostela, Spain

\* Corresponding authors e-mail: ej.oliveira@fct.unl.pt (E.O) and cle@fct.unl.pt (C.L.)

## I - Experimental Section

**Synthesis and physical characterization of compound 1.** Compound HCl.H-Ala-OMe was obtained according with the procedure in (1). HCl. H-Ala-OMe (23.9 mg,  $1.73 \times 10^{-4}$  mol) was neutralized by the addition of 23  $\mu$ l of triethylamine in acetonitrile for 30 minutes. Thereafter, lissamine rhodamine B sulfonyl chloride (Compound A) (50 mg,  $8.66 \times 10^{-5}$  mol) and cesium carbonate ( $1.73 \times 10^{-4}$  mol) were added to the previous mixture and then stirred under N<sub>2</sub> for 30 minutes and cooled at 0°C in an ice-water bath. The final mixture was kept under stirring for 32 hours at room temperature. The product **1** formation was confirmed by TLC (thin layer chromatography). The mixture was filtered, and the filtrate dried under N<sub>2</sub> atmosphere at room temperature. The residue obtained was purified by column chromatography with silica gel (eluent: CH<sub>2</sub>Cl<sub>2</sub>/MeOH 10:1). The fractions were combined, and the product **1** was obtained as a solid.

Red powder (40 mg, 72%), C<sub>31</sub>H<sub>37</sub>N<sub>3</sub>O<sub>8</sub>S<sub>2</sub>, FW = 643.77 Elemental Analysis: (Found: C, 57.65; H, 5.79; N, 6.67; S, 9.72 % CHNS requires: C, 57.84; H, 5.79; N, 6.53; S, 9.96).

<sup>1</sup>H NMR (CDCl<sub>3</sub>, 400 MHz):  $\delta_{\text{H}}$  (ppm) = 1.32 (m, 12H, H1), 1.53 (d,  $J$  = 4Hz 3H,  $\beta$ CH<sub>3</sub> alanine, H23), 3.59 (m, 4H, H2), 3.76 (s, 3H, OCH<sub>3</sub> alanine, H25), 4.23 (m, 1H,  $\alpha$ H alanine, H22), 5.45 (m, 1H, NH alanine), 6.69 (s, 2H, H4, H14), 6.81 (m, 1H, H7, H15), 6.74 (m, 2H, H9, H10), 8.01 (m, 2H, H20, H21), 8.86 (s, 1H, H18).  $\delta_{\text{C}}$  (ppm) = 12.62 (C1, C1'), 19.74 (CH<sub>3</sub> alanine, C25), 28.82 (OCH<sub>3</sub> alanine, C24), 45.94 (C24), 52.92-51.98 (C2, C2'), 95.51 (C4), 113.64 (C18), 114.18 (C7), 127.35-126.94 (C9, C11, C15), 129.91 (C21), 133.26 (C13), 134.20 (C10), 141.72 (C20), 148.44 (C12, C14), 155.56 (C16, C17, C19), 157.71 (C6, C8), 158.78 (C5), 172.62 (C23).

UV-Vis in miliQ water ( $\lambda$ , nm): Band at 570 nm ( $\epsilon$  = 27858 cm<sup>-1</sup>.M<sup>-1</sup>). Emission spectrum in miliQ water ( $\lambda_{\text{exc}}$  = 560 nm,  $\lambda_{\text{emis}}$  = 590 nm). Lifetime:  $\tau$  = 2.47 ns, MALDI-TOF-MS, calc (found): [1H]<sup>+</sup> 644.20 (644.16) m/z.

## II – MALDI-TOF-MS Spectra and Photophysical Characterization

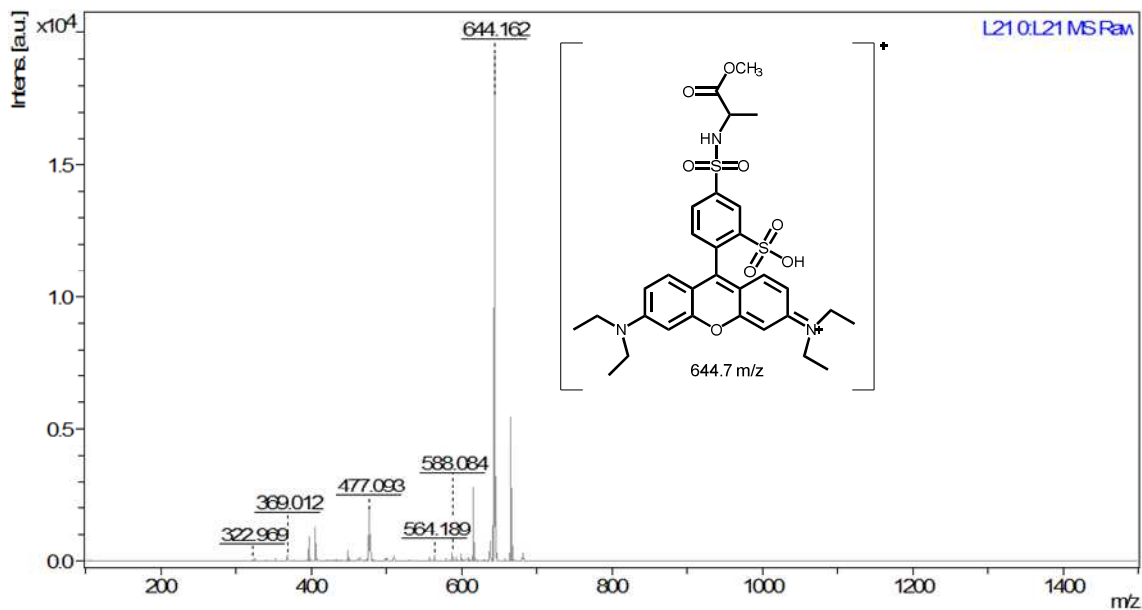

**Figure S1.** MALDI-TOF-MS spectra of compound **1** using as matrix the sinapic acid.

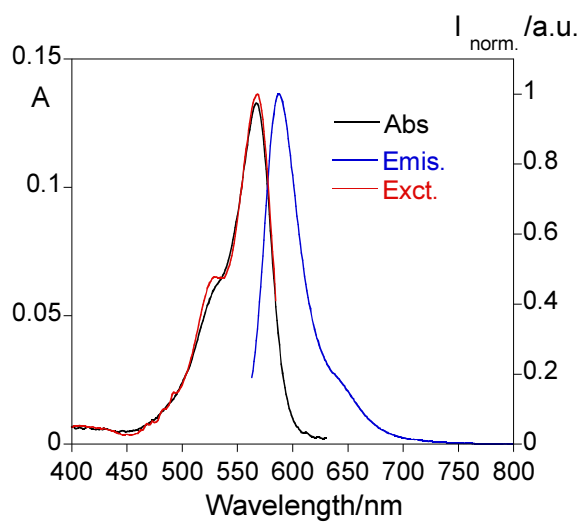

**Figure S2.** Absorption, emission and excitation spectra of compound **1** in aqueous solution at room temperature. ([**1**] =  $4.66 \times 10^{-6}$  M,  $\lambda_{\text{exc.}}$  = 560 nm, T = 298 K).

## III – NMR data

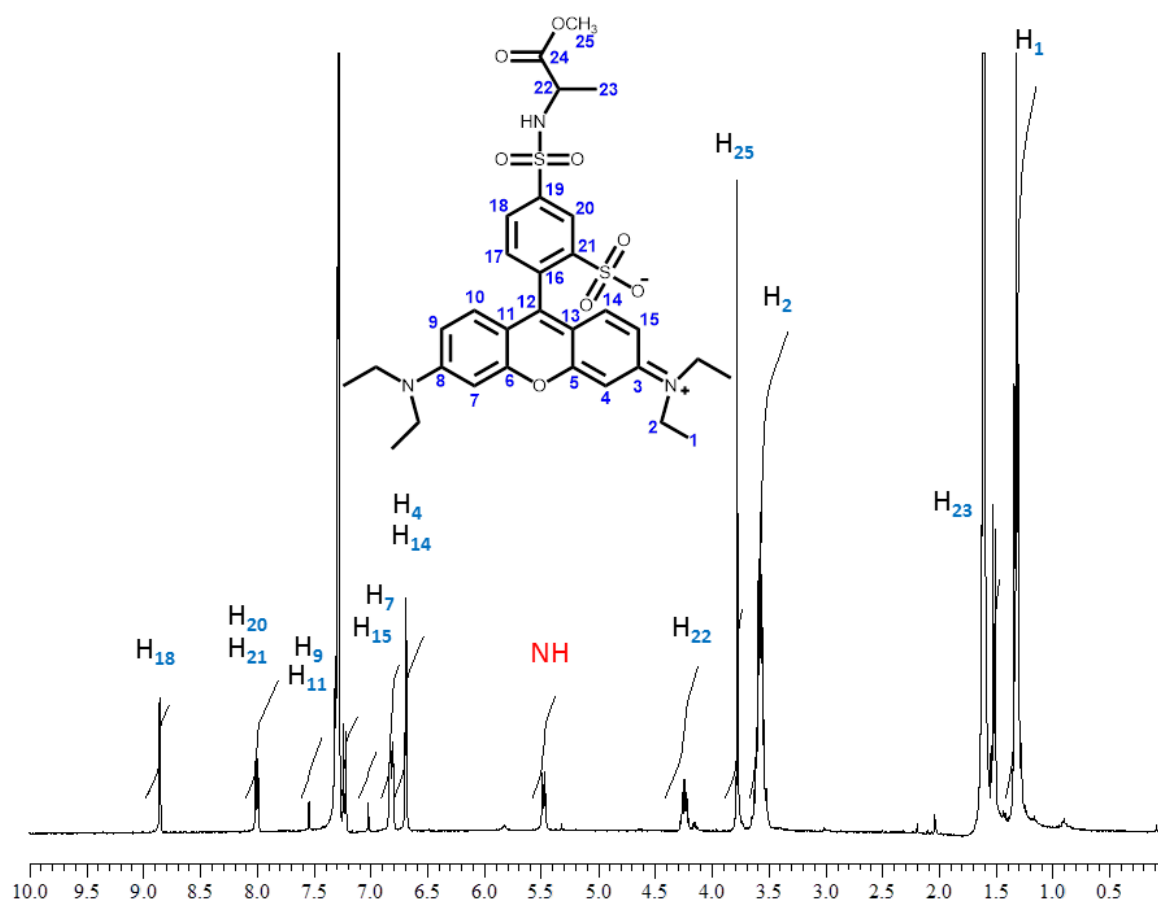

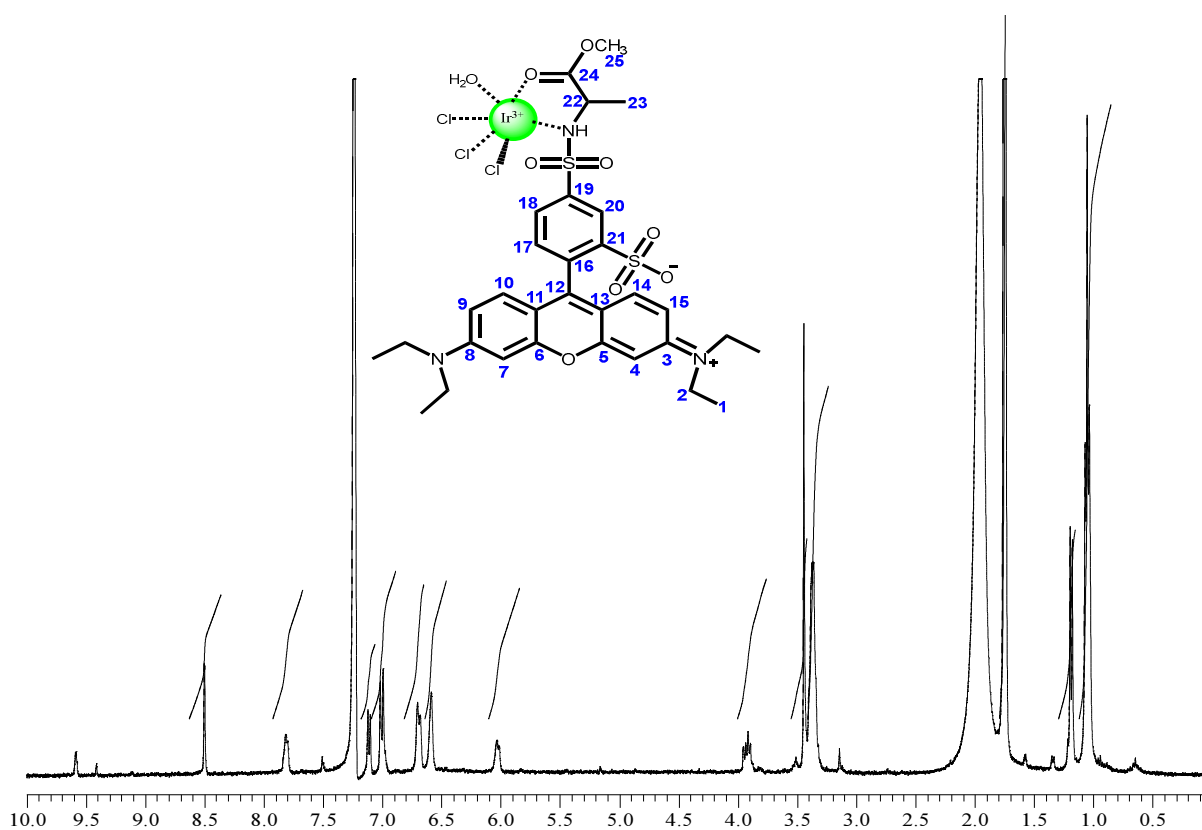

**Figure S3.**  $^1\text{H}$  NMR spectra of compound **1** before (top) and after (down) the addition of 1 equiv. of  $\text{Ir}^{3+}$  to form the species  $\text{Ir@1}$  complex in  $\text{CDCl}_3$ .

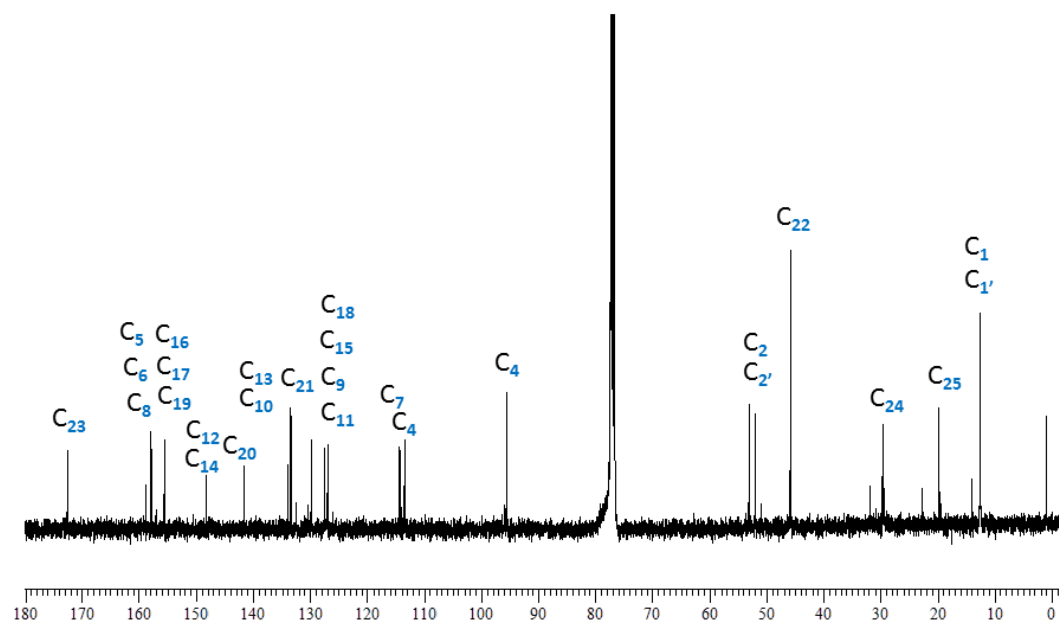

**Figure S4.**  $^{13}\text{C}$  NMR spectrum of compound 1 in  $\text{CDCl}_3$ .

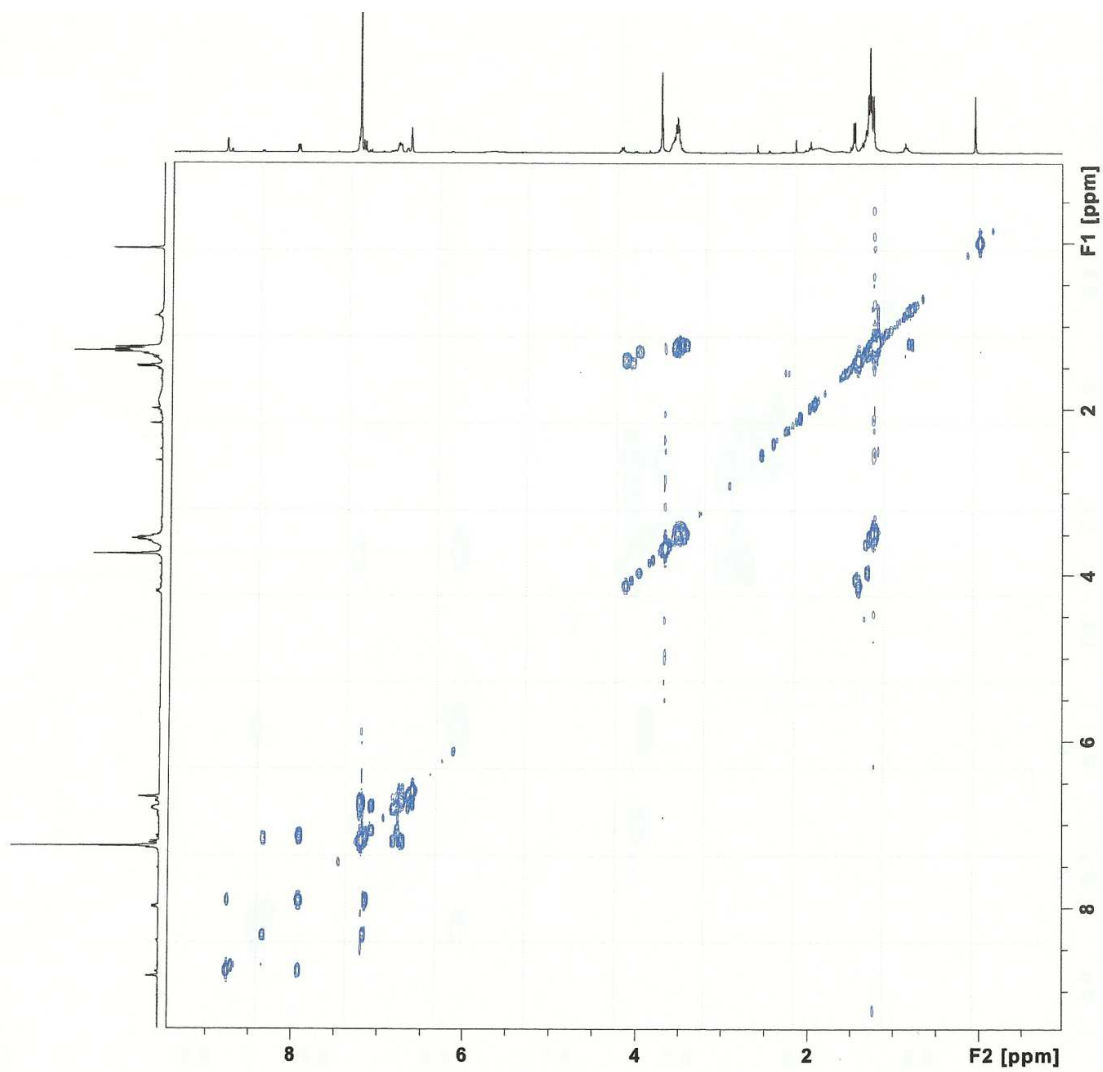

**Figure S5.** COSY ( $^1\text{H}/^1\text{H}$ ) NMR spectrum of compound **1** in  $\text{CDCl}_3$ .



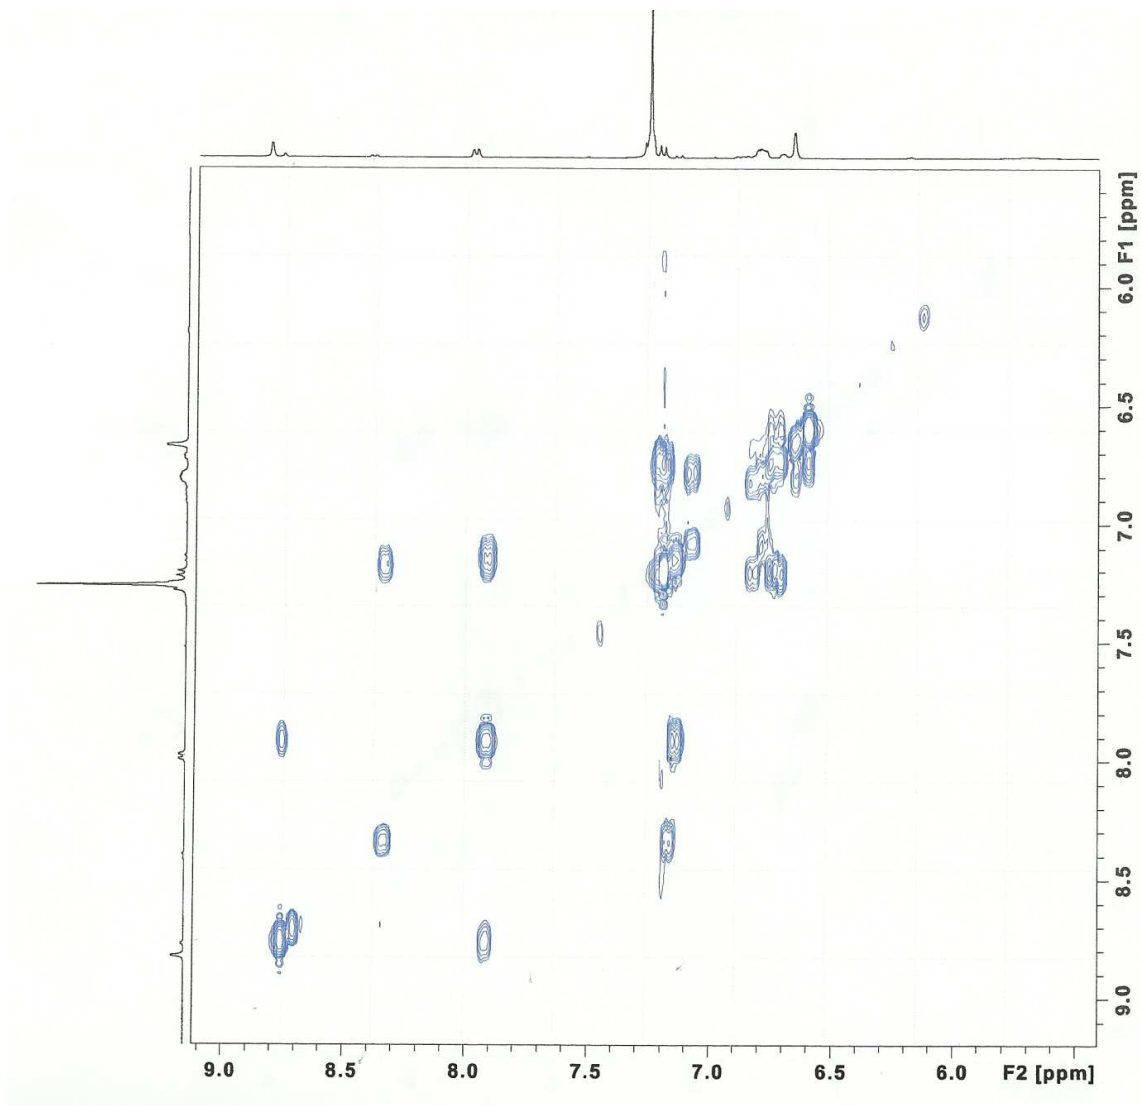

**Figure S6.** COSY ( $^1\text{H}/^1\text{H}$ ) NMR spectrum of compound **1** in  $\text{CDCl}_3$  (amplification 9.0-5.0 ppm).

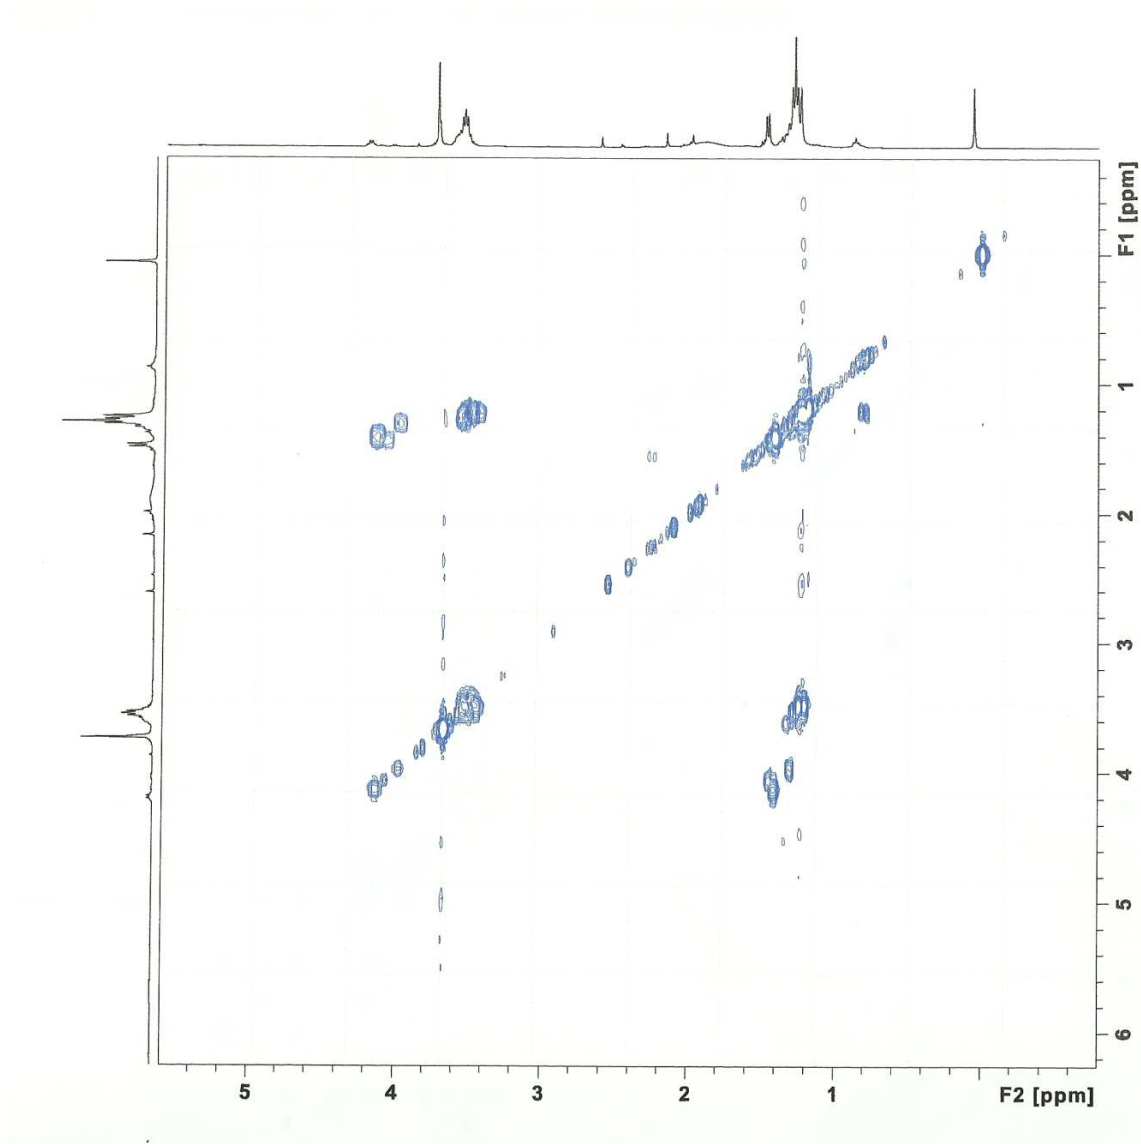

**Figure S7.** COSY ( $^1\text{H}/^1\text{H}$ ) NMR spectrum of compound **1** in  $\text{CDCl}_3$  (amplification 1.0-5.0 ppm).

IV – Titration of compound **1** with the pH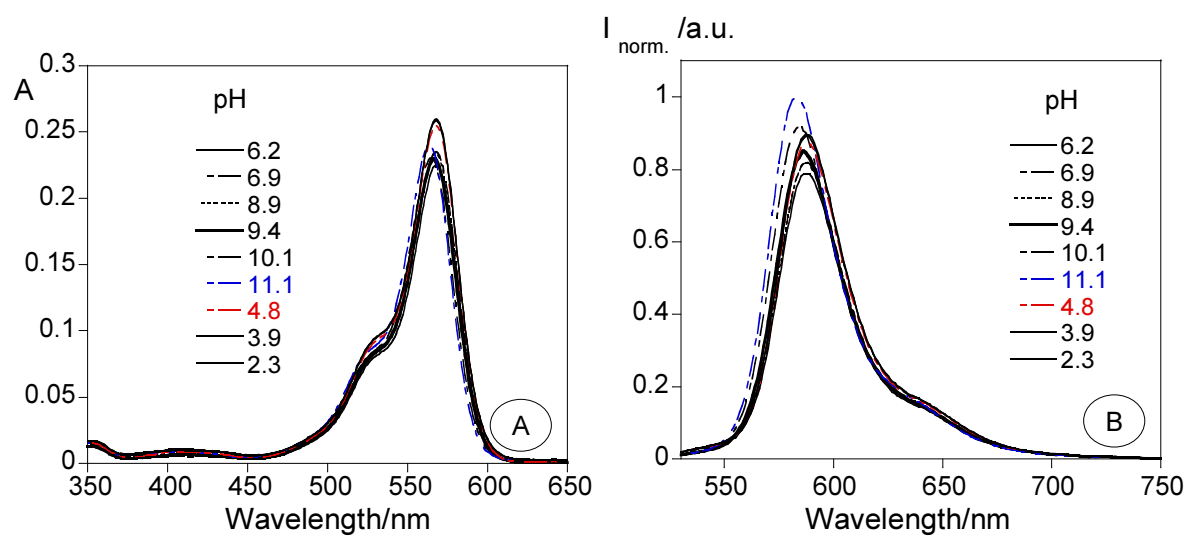

**Figure S8** – Absorption and emission titrations of compound **1** in aqueous solution with pH. ( $[1] = 1.16 \times 10^{-5} \text{ M}$ ,  $\lambda_{\text{exc.}} = 535 \text{ nm}$ ,  $T = 298 \text{ K}$ ).

## V – Theoretical calculations

**Table S1:** Calculated  $^1\text{H}$  chemical shieldings ( $\sigma$ ) for the amino acid (in ppm), calculated at the B3LYP/6-31G\*\* level (plus LanL2DZ for the  $\text{Ir}^{3+}$  cation) in implicit acetonitrile, along with the complexation induced chemical shifts ( $\delta$ ) for each group of protons. Since only variations in the chemical shielding are being considered, conversion of chemical shielding to chemical shifts is not required (note, however, that temperature and dynamic effects are completely ignored).

|                                 | $\sigma_{\mathbf{1}}$ / ppm | $\sigma_{\text{Ir@}\mathbf{1}}$ / ppm | $\sigma_{\text{Ir@}\mathbf{1}} - \sigma_{\mathbf{1}}$ / ppm |
|---------------------------------|-----------------------------|---------------------------------------|-------------------------------------------------------------|
| NH                              | 28.15                       | 25.87                                 | 2.28 (0.6 <sup>b</sup> )                                    |
| CH <sub>3</sub> <sup>(a)</sup>  | 30.34                       | 29.90                                 | 0.44 (0.3 <sup>b</sup> )                                    |
| CH                              | 27.07                       | 27.00                                 | -0.07 (-0.3 <sup>b</sup> )                                  |
| OCH <sub>3</sub> <sup>(a)</sup> | 27.08                       | 27.51                                 | -0.43 (-0.4 <sup>b</sup> )                                  |

a) average over the three equivalent nuclei;  
b) experimental values presented for reference;

**Table S2:** Calculated vertical excitation energies ( $E_{exc}$ ) for the receptor (**1**) and complex (**Ir@1**) in the gas-phase, calculated at the B3LYP/6-31G\*\* level (plus LanL2DZ for the  $\text{Ir}^{3+}$  cation), along with the corresponding oscillator strengths ( $f_{oscillator}$ ) and excitation wavelengths ( $\lambda_{exc}$  / nm).

| excitation | Ir@1           |                      |                  | 1              |                      |                  |
|------------|----------------|----------------------|------------------|----------------|----------------------|------------------|
|            | $E_{exc}$ / eV | $\lambda_{exc}$ / nm | $f_{oscillator}$ | $E_{exc}$ / eV | $\lambda_{exc}$ / nm | $f_{oscillator}$ |
| 1          | 2.0911         | 592.91               | 0.0193           | 1.9497         | 635.91               | 0.0292           |
| 2          | 2.3351         | 530.96               | 0.0000           | 2.6328         | 470.93               | 0.0565           |
| 3          | 2.4807         | 499.79               | 0.0003           | 2.8897         | 429.06               | 0.6501           |
| 4          | 2.7227         | 455.37               | 0.1584           | 2.9455         | 420.93               | 0.0785           |
| 5          | 2.7519         | 450.53               | 0.3308           | 3.0627         | 404.82               | 0.0442           |
| 6          | 2.7680         | 447.92               | 0.1682           | 3.3107         | 374.50               | 0.0024           |
| 7          | 2.7816         | 445.73               | 0.0021           | 3.6007         | 344.34               | 0.0567           |
| 8          | 2.8440         | 435.95               | 0.0731           | 3.6102         | 343.42               | 0.0139           |
| 9          | 2.8522         | 434.70               | 0.0012           | 3.8230         | 324.31               | 0.0054           |
| 10         | 2.8869         | 429.46               | 0.0426           | 3.8605         | 321.16               | 0.0108           |

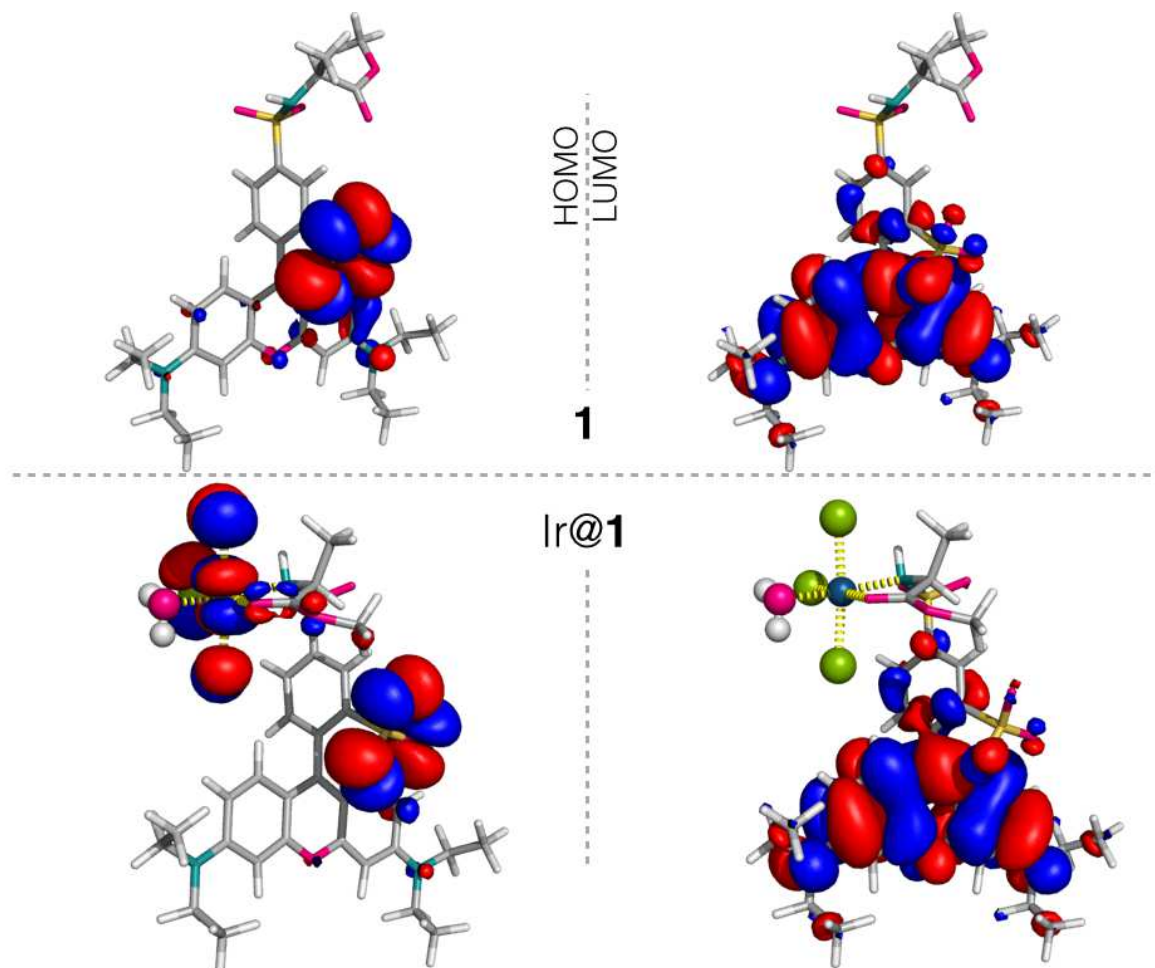

**Figure S9.** The depiction of the HOMO (left) and LUMO (right) of the free receptor (top) and complex (bottom) drawn at the  $\pm 0.015$  isovalue. Three Cl<sup>-</sup> counter anions and one water molecule complete the coordination sphere of Ir<sup>3+</sup>.

## References

- (1) E. Oliveira, J. L. Capelo, J. C. Lima, C. Lodeiro, *Amino Acids*, 2012, **43**, 1779.
